# Supplementary material for: Evasion of Human Neutrophil-Mediated Host Defense during Toxoplasma gondii Infection
Source: PubMed Central journal article supplement (PMC5821086; doi:10.1128/mbio.02027-17), 2018-02-13

Figure S1

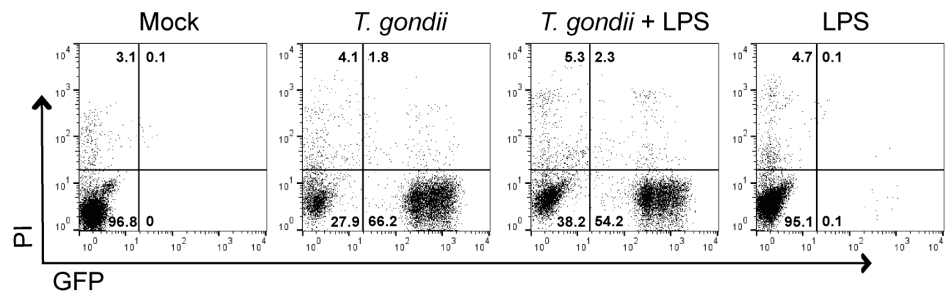

Supplement: mbo001183713sf1.pdf [file mbo001183713sf1.pdf]
